# Supplementary material for: Synthesis, structures and properties of Mn(II) coordination frameworks based on R-isophthalate (R = –CH3or –C(CH3)3) and various dipyridyl-type co-ligands
Source: Royal Society of Chemistry journal article supplement (doi:10.1039/b811725j), 2008-12-16
Supplement: b811725j.pdf [file b811725j.pdf]

## Supporting Information for

### Synthesis, structures and properties of Mn(II) coordination frameworks based on R-isophthalate (R = –CH<sub>3</sub> or –C(CH<sub>3</sub>)<sub>3</sub>) and various dipyridyl-type co-ligands

Lu-Fang Ma<sup>a,b</sup>, Li-Ya Wang<sup>a,\*</sup>, Yao-Yu Wang<sup>b,\*</sup>, Miao Du<sup>c</sup>, Jian-Ge Wang<sup>a</sup>

<sup>a</sup> College of Chemistry and Chemical Engineering, Luoyang Normal University, Luoyang 471022, P. R. China

<sup>b</sup> Key Laboratory of Synthetic and Natural Functional Molecule Chemistry of Ministry of Education, Department of Chemistry, Northwest University, Xi'an 710069, P. R. China

<sup>c</sup> College of Chemistry and Life Science, Tianjin Normal University, Tianjin 300387, P. R. China

Table S1. Selected bond lengths (Å) and angles (°) for **1**

|                     |            |                     |           |
|---------------------|------------|---------------------|-----------|
| Mn(1)-O(2)#1        | 2.0930(15) | O(1)-Mn(1)-N(2)#3   | 88.84(6)  |
| Mn(1)-O(1)          | 2.0989(15) | O(3)#2-Mn(1)-N(2)#3 | 96.84(7)  |
| Mn(1)-O(3)#2        | 2.1662(16) | O(2)#1-Mn(1)-N(1)   | 90.52(7)  |
| Mn(1)-N(2)#3        | 2.2980(17) | O(1)-Mn(1)-N(1)     | 91.58(6)  |
| Mn(1)-N(1)          | 2.3304(18) | O(3)#2-Mn(1)-N(1)   | 83.91(7)  |
| Mn(1)-O(4)#2        | 2.480(2)   | N(2)#3-Mn(1)-N(1)   | 177.70(7) |
| O(2)#1-Mn(1)-O(1)   | 112.72(6)  | O(2)#1-Mn(1)-O(4)#2 | 148.55(7) |
| O(2)#1-Mn(1)-O(3)#2 | 96.82(7)   | O(1)-Mn(1)-O(4)#2   | 96.46(6)  |
| O(1)-Mn(1)-O(3)#2   | 150.19(7)  | O(3)#2-Mn(1)-O(4)#2 | 55.87(6)  |
| O(2)#1-Mn(1)-N(2)#3 | 87.23(7)   | N(2)#3-Mn(1)-O(4)#2 | 81.69(7)  |

Symmetry transformations used to generate equivalent atoms:

#1 -x+1/2,-y+3/2,-z ; #2 -x+1/2,y-1/2,-z+1/2; #3 x-1/2,y+1/2,z

Table S2. Selected bond lengths (Å) and angles (°) for **2**

|                     |          |                   |          |
|---------------------|----------|-------------------|----------|
| Mn(1)-O(3)#1        | 2.078(6) | O(4)#2-Mn(1)-O(1) | 146.2(3) |
| Mn(1)-O(4)#2        | 2.094(6) | N(2)#3-Mn(1)-O(1) | 97.2(3)  |
| Mn(1)-N(2)#3        | 2.246(9) | O(3)#1-Mn(1)-N(1) | 86.0(3)  |
| Mn(1)-O(1)          | 2.257(7) | O(4)#2-Mn(1)-N(1) | 91.4(3)  |
| Mn(1)-N(1)          | 2.292(9) | N(2)#3-Mn(1)-N(1) | 172.9(3) |
| Mn(1)-O(2)          | 2.323(7) | O(1)-Mn(1)-N(1)   | 84.3(3)  |
| O(3)#1-Mn(1)-O(4)#2 | 122.6(3) | O(3)#1-Mn(1)-O(2) | 147.2(3) |
| O(3)#1-Mn(1)-N(2)#3 | 87.0(3)  | O(4)#2-Mn(1)-O(2) | 90.2(3)  |

|                     |         |                   |         |
|---------------------|---------|-------------------|---------|
| O(4)#2-Mn(1)-N(2)#3 | 91.2(3) | N(2)#3-Mn(1)-O(2) | 91.6(3) |
| O(3)#1-Mn(1)-O(1)   | 90.6(3) | O(1)-Mn(1)-O(2)   | 57.1(2) |

Symmetry transformations used to generate equivalent atoms:

#1  $x, -y+1, z-1/2$ ; #2  $-x+1/2, y-1/2, -z+1/2$ ; #3  $x+1/2, y-1/2, z$

Table S3. Selected bond lengths (Å) and angles (°) for **3**

|                     |           |                     |            |
|---------------------|-----------|---------------------|------------|
| Mn(1)-O(4)#1        | 2.090(2)  | O(3)#2-Mn(1)-N(2)#3 | 86.95(10)  |
| Mn(1)-O(3)#2        | 2.124(2)  | O(2)-Mn(1)-N(2)#3   | 89.89(11)  |
| Mn(1)-O(2)          | 2.205(2)  | O(4)#1-Mn(1)-N(1)   | 93.53(11)  |
| Mn(1)-N(2)#3        | 2.289(3)  | O(3)#2-Mn(1)-N(1)   | 83.77(9)   |
| Mn(1)-N(1)          | 2.299(3)  | O(2)-Mn(1)-N(1)     | 95.01(10)  |
| Mn(1)-O(1)          | 2.377(2)  | N(2)#3-Mn(1)-N(1)   | 167.68(10) |
| O(4)#1-Mn(1)-O(3)#2 | 116.16(9) | O(4)#1-Mn(1)-O(1)   | 145.78(9)  |
| O(4)#1-Mn(1)-O(2)   | 89.27(9)  | O(3)#2-Mn(1)-O(1)   | 97.70(8)   |
| O(3)#2-Mn(1)-O(2)   | 154.57(9) | O(2)-Mn(1)-O(1)     | 56.96(7)   |
| O(4)#1-Mn(1)-N(2)#3 | 97.84(11) | N(2)#3-Mn(1)-O(1)   | 88.27(10)  |

Symmetry transformations used to generate equivalent atoms:

#1  $-x+2, -y, -z+2$ ; #2  $x-1, y, z$ ; #3  $x, y-1, z+1$

Table S4. Selected bond lengths (Å) and angles (°) for **4**

|                     |           |                     |           |
|---------------------|-----------|---------------------|-----------|
| Mn(1)-O(3)#1        | 2.099(3)  | O(2)-Mn(1)-N(1)     | 88.35(9)  |
| Mn(1)-O(4)#2        | 2.119(3)  | O(3)#1-Mn(1)-N(2)#3 | 89.56(12) |
| Mn(1)-O(2)          | 2.216(3)  | O(4)#2-Mn(1)-N(2)#3 | 86.48(9)  |
| Mn(1)-N(1)          | 2.292(3)  | O(2)-Mn(1)-N(2)#3   | 90.32(8)  |
| Mn(1)-N(2)#3        | 2.308(3)  | N(1)-Mn(1)-N(2)#3   | 178.01(9) |
| Mn(1)-O(1)          | 2.343(3)  | O(3)#1-Mn(1)-O(1)   | 155.42(9) |
| O(3)#1-Mn(1)-O(4)#2 | 108.22(8) | O(4)#2-Mn(1)-O(1)   | 95.89(9)  |
| O(3)#1-Mn(1)-O(2)   | 97.95(8)  | O(2)-Mn(1)-O(1)     | 57.74(7)  |
| O(4)#2-Mn(1)-O(2)   | 153.58(9) | N(1)-Mn(1)-O(1)     | 90.91(12) |
| O(3)#1-Mn(1)-N(1)   | 92.08(13) | N(2)#3-Mn(1)-O(1)   | 87.14(12) |

Symmetry transformations used to generate equivalent atoms:

#1  $-x+1, -y+1, -z+1$ ; #2  $x, y+1, z$ ; #3  $x+1, y, z-1$

Table S5. Selected bond lengths (Å) and angles (°) for **5**

|              |            |                     |           |
|--------------|------------|---------------------|-----------|
| Mn(1)-O(1)   | 2.1423(15) | O(9)-Mn(1)-O(5)     | 82.87(6)  |
| Mn(1)-O(9)   | 2.1566(16) | O(6)-Mn(1)-O(5)     | 54.78(5)  |
| Mn(1)-O(6)   | 2.1905(13) | O(7)#1-Mn(1)-O(5)   | 169.90(6) |
| Mn(1)-O(7)#1 | 2.1952(14) | N(1)-Mn(1)-O(5)     | 91.74(6)  |
| Mn(1)-N(1)   | 2.2315(18) | O(2)#2-Mn(2)-O(2)   | 180.0     |
| Mn(1)-O(5)   | 2.5295(14) | O(2)#2-Mn(2)-O(8)#1 | 89.38(6)  |
| Mn(2)-O(2)#2 | 2.1211(15) | O(2)-Mn(2)-O(8)#1   | 90.62(6)  |
| Mn(2)-O(2)   | 2.1212(15) | O(2)#2-Mn(2)-O(8)#3 | 90.62(6)  |
| Mn(2)-O(8)#1 | 2.1550(14) | O(2)-Mn(2)-O(8)#3   | 89.38(6)  |

|                   |            |                     |           |
|-------------------|------------|---------------------|-----------|
| Mn(2)-O(8)#3      | 2.1551(14) | O(8)#1-Mn(2)-O(8)#3 | 180.00(5) |
| Mn(2)-O(6)        | 2.2459(13) | O(2)#2-Mn(2)-O(6)   | 89.13(5)  |
| Mn(2)-O(6)#2      | 2.2459(13) | O(2)-Mn(2)-O(6)     | 90.86(5)  |
| O(1)-Mn(1)-O(9)   | 177.12(6)  | O(8)#1-Mn(2)-O(6)   | 80.86(5)  |
| O(1)-Mn(1)-O(6)   | 93.75(6)   | O(8)#3-Mn(2)-O(6)   | 99.13(5)  |
| O(9)-Mn(1)-O(6)   | 88.22(6)   | O(2)#2-Mn(2)-O(6)#2 | 90.86(5)  |
| O(1)-Mn(1)-O(7)#1 | 93.25(6)   | O(2)-Mn(2)-O(6)#2   | 89.14(5)  |
| O(9)-Mn(1)-O(7)#1 | 87.46(6)   | O(8)#1-Mn(2)-O(6)#2 | 99.14(5)  |
| O(6)-Mn(1)-O(7)#1 | 122.19(5)  | O(8)#3-Mn(2)-O(6)#2 | 80.87(5)  |
| O(1)-Mn(1)-N(1)   | 84.91(7)   | O(6)-Mn(2)-O(6)#2   | 180.0     |
| O(9)-Mn(1)-N(1)   | 92.28(7)   | O(7)#1-Mn(1)-N(1)   | 91.57(6)  |
| O(6)-Mn(1)-N(1)   | 146.21(6)  | O(1)-Mn(1)-O(5)     | 96.55(6)  |

Symmetry transformations used to generate equivalent atoms:

#1  $x+1,y,z$ ; #2  $-x+1,-y,-z+1$ ; #3  $-x,-y,-z+1$

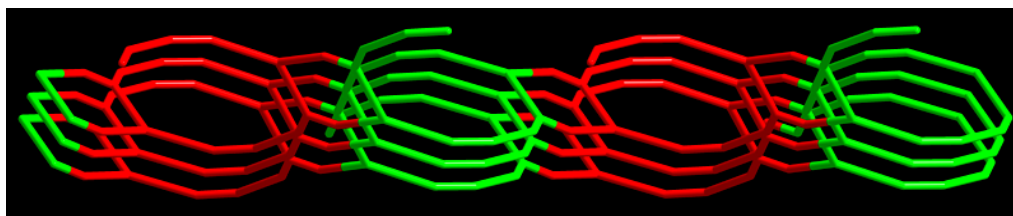

(a)

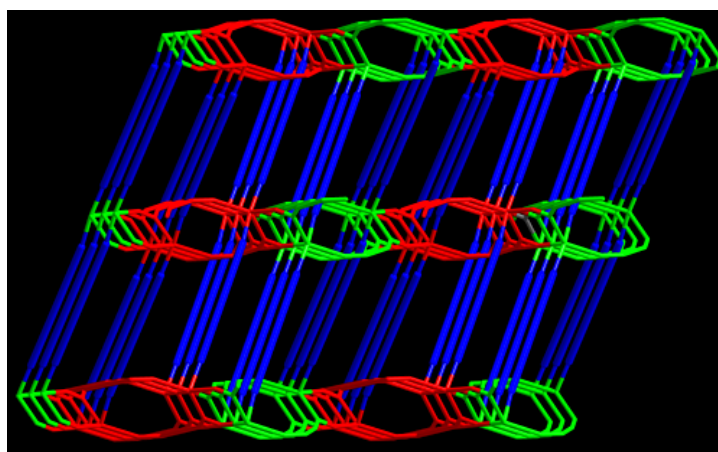

(b)

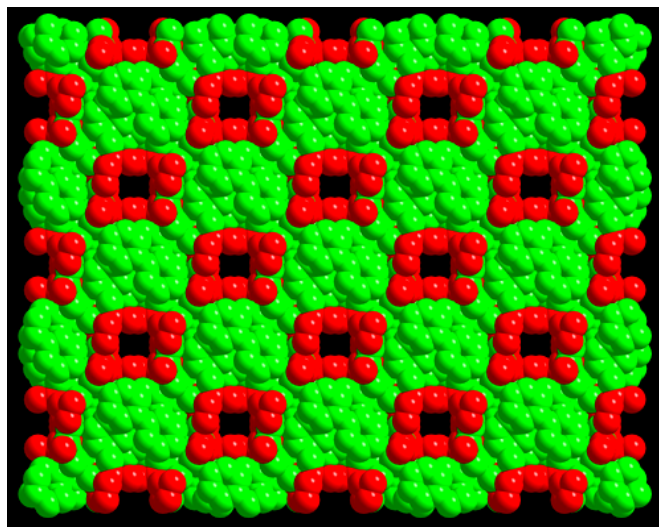

(c)

Fig. S1. (a) 2D helical layer in **1**. (b) Schematic illustration of the pillared helical-layer structure of **1**. Left-helical chains are marked as green and right-helical chains are marked as red. Blue sticks represent bipyr molecules. (c) Space-filling model to show the channels along the *c*-axis direction.

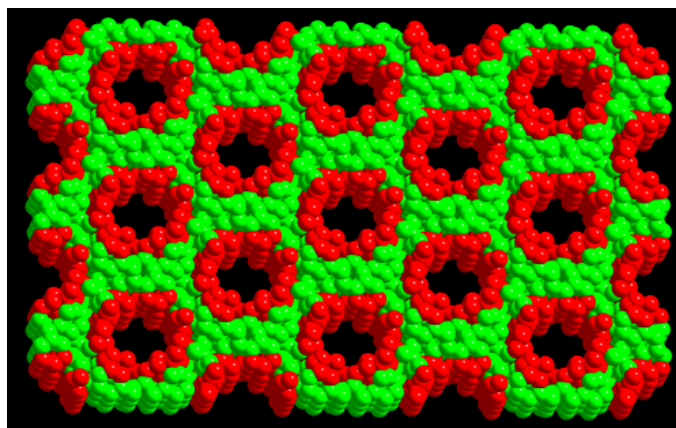

Fig. S2. Space-filling model to show the channels along the *c*-axis. Guest water molecules are omitted for clarity.

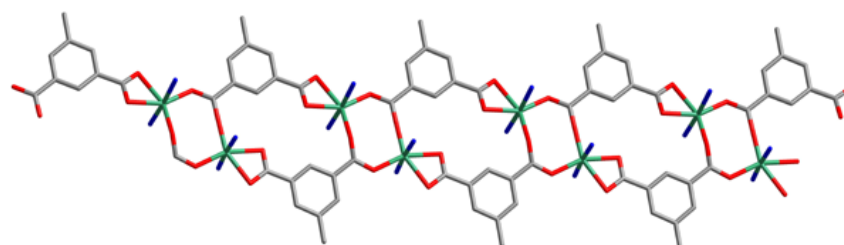

(a)

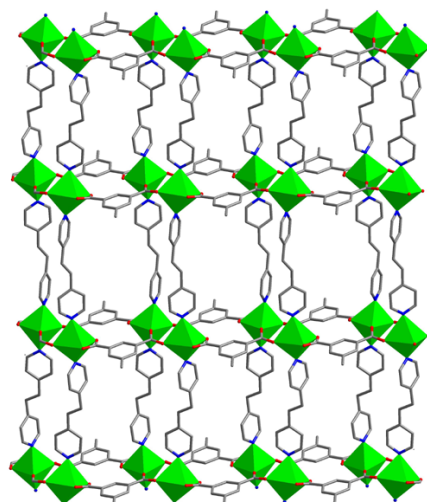

(b)

Fig. S3. (a) View of a 1D ribbonlike chain of Mn atoms bridged by mip ligand in **4**. (b) Ribbon like chains pillared by flexible bpa ligands into a 2D layer.

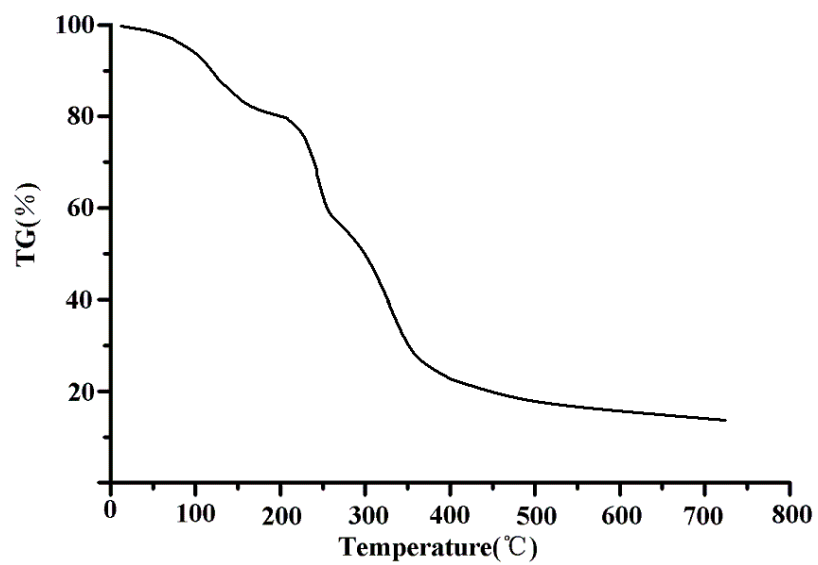

Figure S4a. TGA plot of complex **2**.

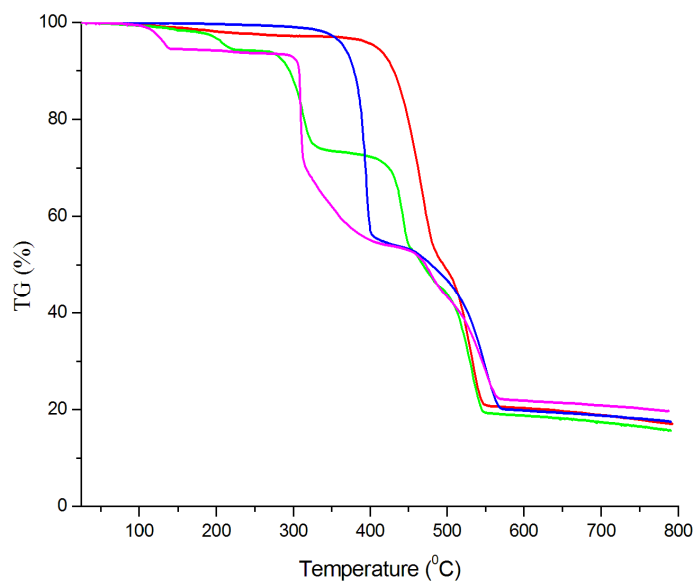

Figure S4b. TGA plot of complexes **1**, **3**, **4**, **5**. (Red for **1**, Green for **3**, Blue for **4** and Magenta for **5**).

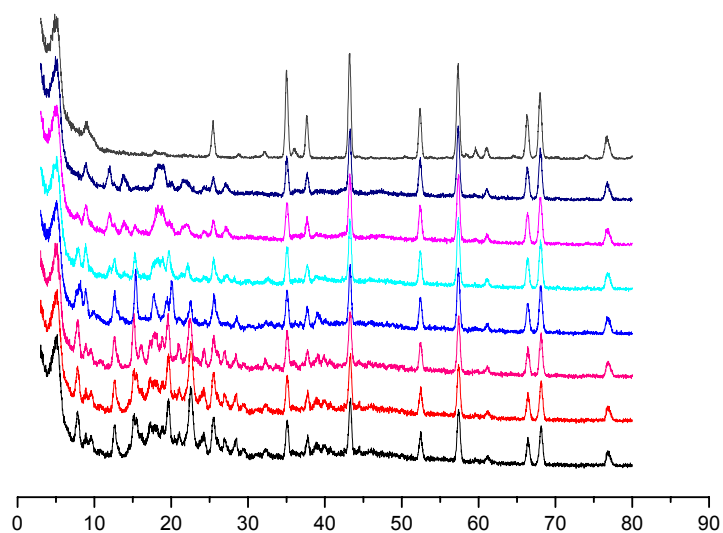

Figure S5. Temperature progressive of X-ray power diffraction patterns for **2**. 25 °C (black); 100 °C (red); 150 °C (pink); 200 °C (blue); 230 °C (cyan); 260 °C (magenta); 300 °C (navy); 350 °C (dark gray).
